# Supplementary material
Source: Research Square preprint supplement (doi:10.21203/rs.3.rs-9794767/v1)
Supplement: Supplementary file 1 [file be2be66821242ba3b7ffaafe.pdf]

# Supplementary Information

## Interpretable Machine Learning Predicts Hepatic Fat Response to a Monounsaturated Fat-Enriched Diet in Steatotic Liver Disease

AM Jalabera, J Yang, H Zelicha, W Hsu, P Pajukanta, A Bui, Z Li, T Hsiai (corresponding author).

### Contents

- Supplementary Methods
- Supplementary Figures S1-S10
- Supplementary Table S1 - HFF Change Prediction Performance by Feature Set
- Supplementary Table S2 - MASLD Classification and HFF Change Performance by Subgroup
- Supplementary Table S3 - Model Hyperparameter and Regularization Specifications
- Supplementary Table S4 - Master Variable Codebook and Baseline Missingness
- Supplementary Table S5 -TRIPOD+AI Reporting Checklist

### Supplementary Methods

Detailed methodological information - including the bootstrap variable selection procedure, hyperparameter search spaces, calibration evaluation, and SHAP interpretation pipeline - is documented in the analysis code repository (<https://github.com/Alejandro1149662/hat-masld-predictive-analysis>). Key supplementary procedures are summarized below.

**Bootstrap variable selection.** We performed 100 bootstrap resamples of the training partition ( $n=553$ ); a Random Forest ( $n\_estimators=50$ ) was fit on each resample and per-feature selection frequency was recorded. Features selected in  $\geq 60\%$  of resamples were retained for downstream modeling, with multicollinearity-aware top-k truncation applied to mitigate redundancy between Insulin and HOMA-IR (Pearson  $r \approx 0.94$ ).

**Hyperparameter optimization.** RandomizedSearchCV ( $n\_iter=50$ ) with 5-fold stratified cross-validation on the training partition was used to select hyperparameters per model class. Final hyperparameter values are tabulated in Supplementary Table S3.

**Calibration assessment.** We report Expected Calibration Error (ECE,  $n\_bins=10$ ) and Brier score on the held-out test set, with reliability diagrams shown in Supplementary Figure S9.

**Decision-curve analysis.** Net-benefit curves were computed across treatment thresholds 0.05–0.85; results are shown in Figure 8 (main manuscript).

# Supplementary Figures

All 10 supplementary figures (S1–S10) are reproduced below.

## Supplementary Figure S1

Baseline MASLD prevalence and treatment effects on imaging and inflammatory outcomes.

### S1. Baseline MASLD Prevalence and Treatment Effects on Imaging & Inflammatory Outcomes

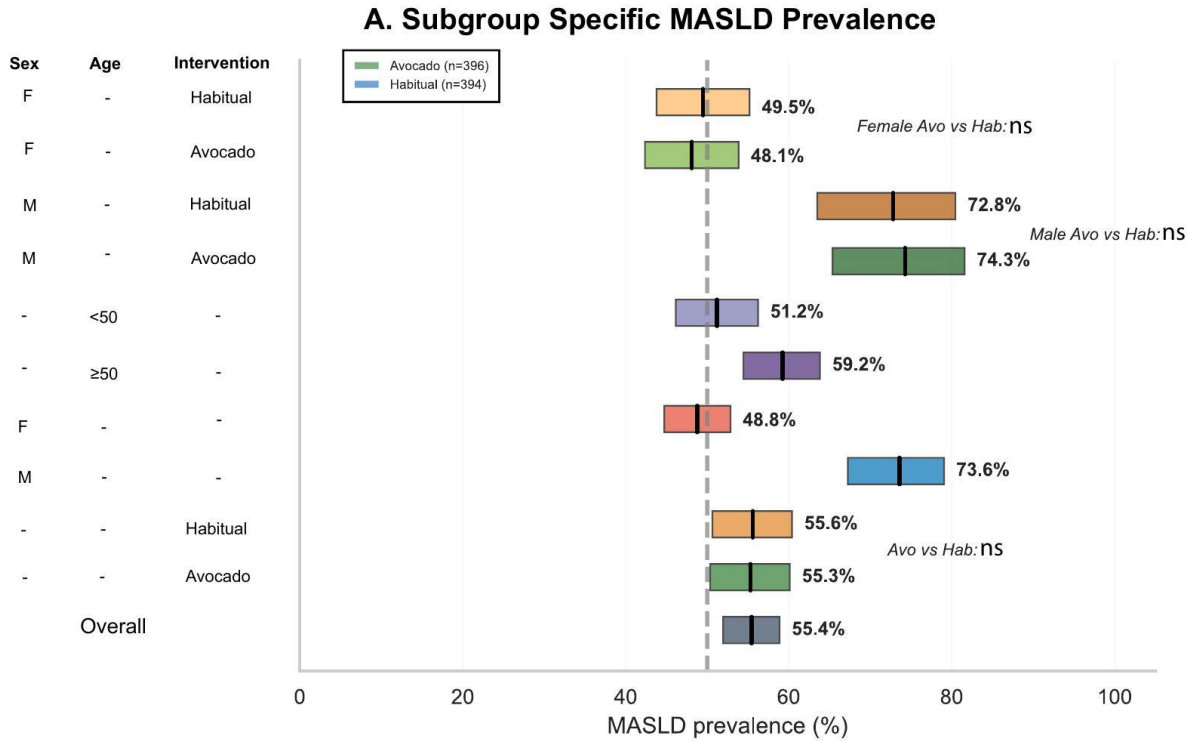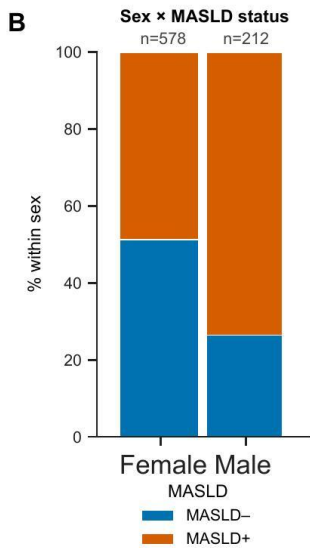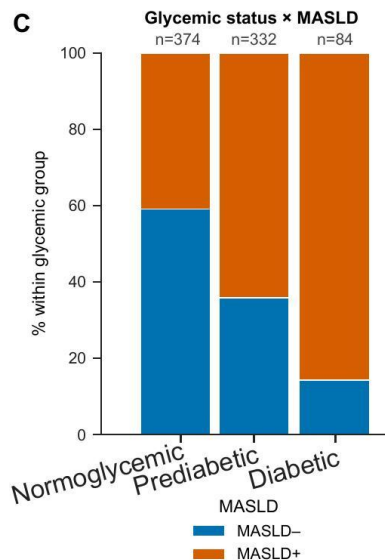

## Supplementary Figure S2

Baseline HFF and VAT distributions stratified by sex and glycaemic status.

S2: Baseline HFF and VAT distributions stratified by sex and glycaemic status.

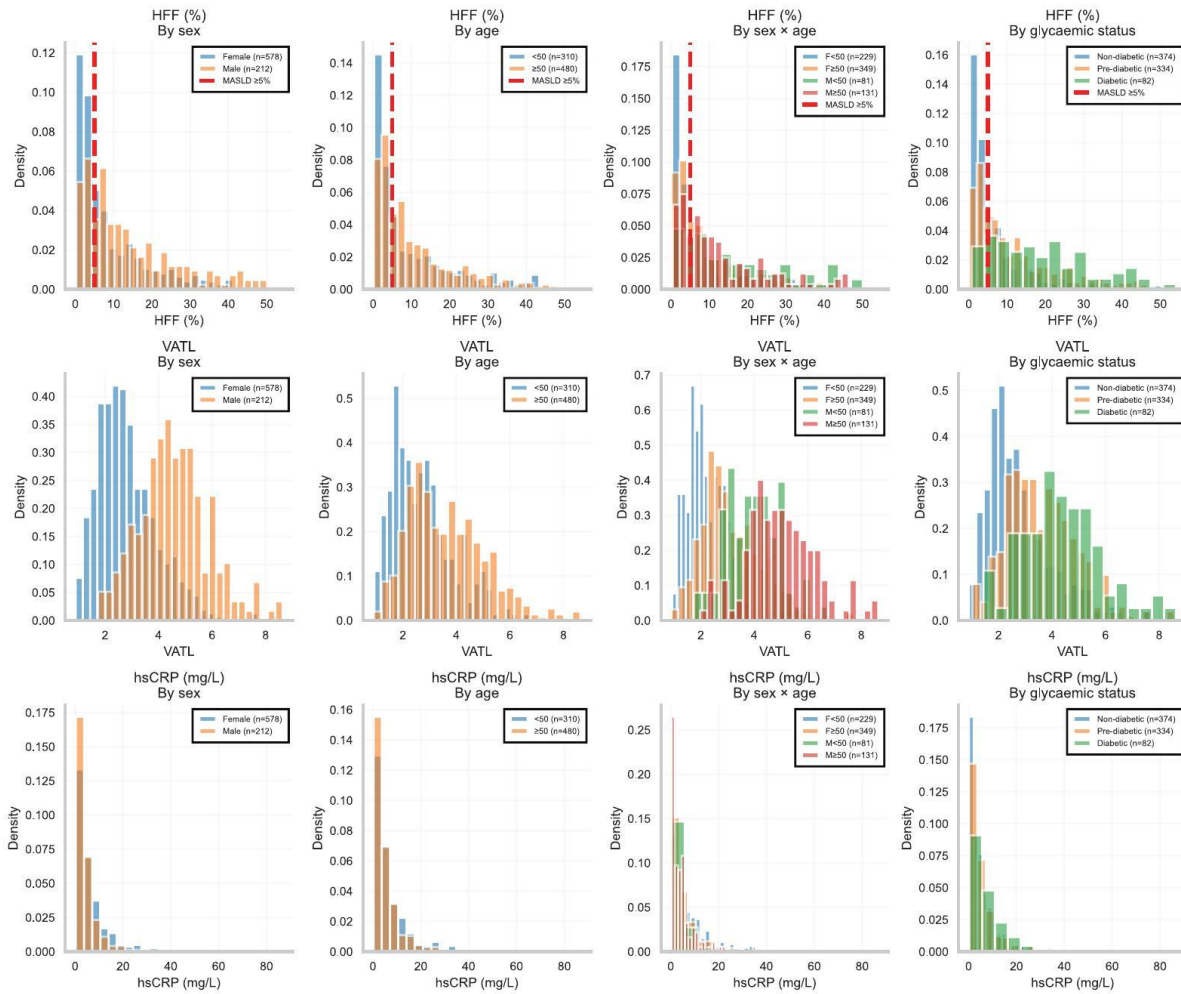

## Supplementary Figure S3

Correlation matrices among MASLD-status predictors (insulin resistance, anthropometry, lipid panel).

S3: Correlation matrices among MASLD Status predictors

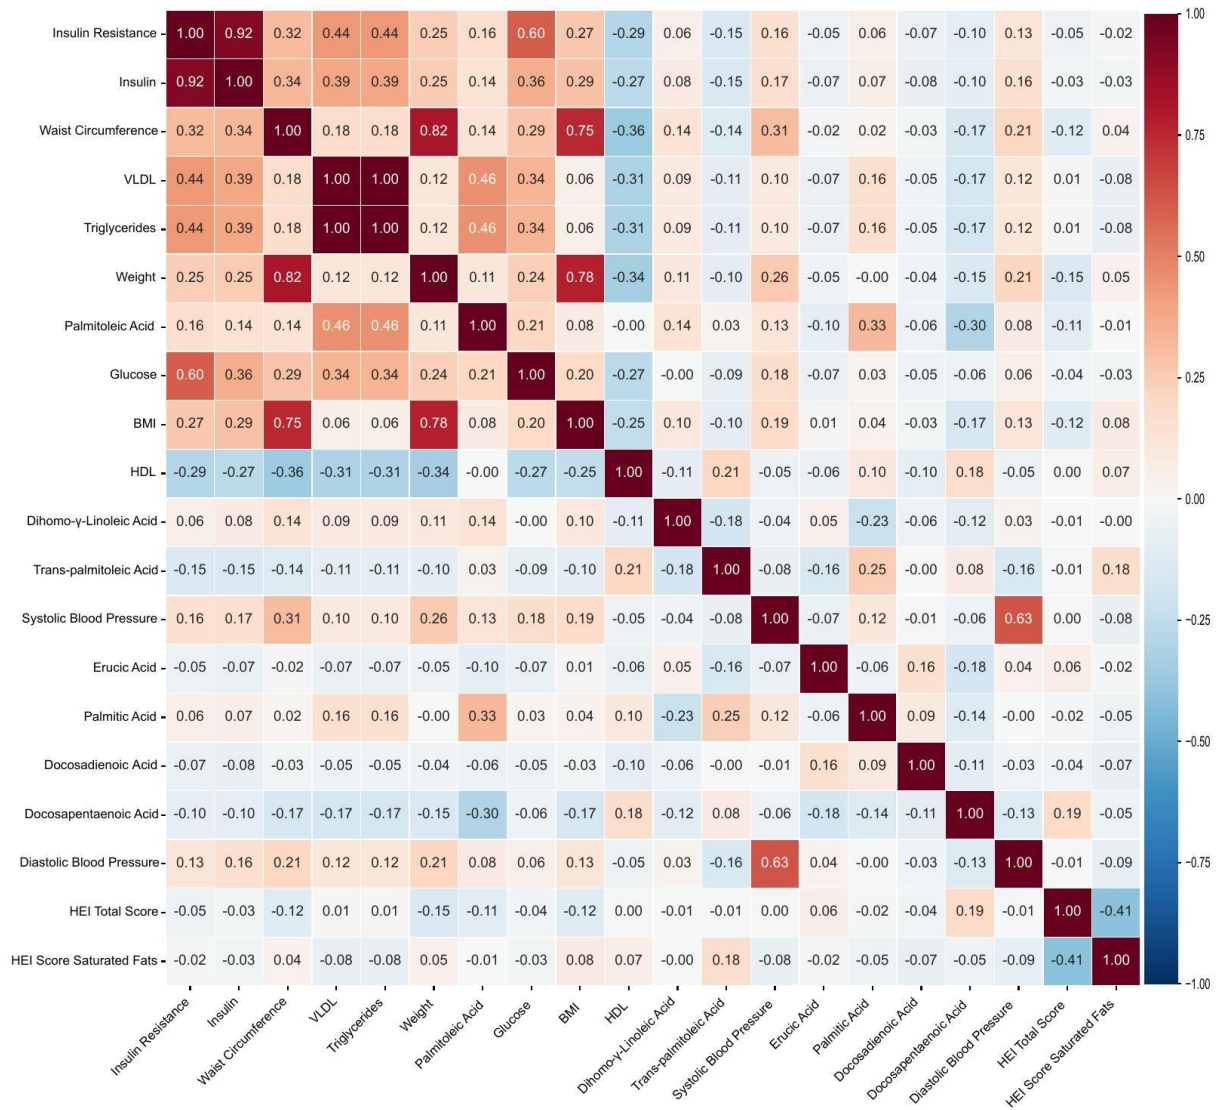

# Supplementary Figure S4

MASLD classification: supplementary performance analysis (bootstrap score distributions).

## S4. MASLD Classification: Supplementary Performance Analysis

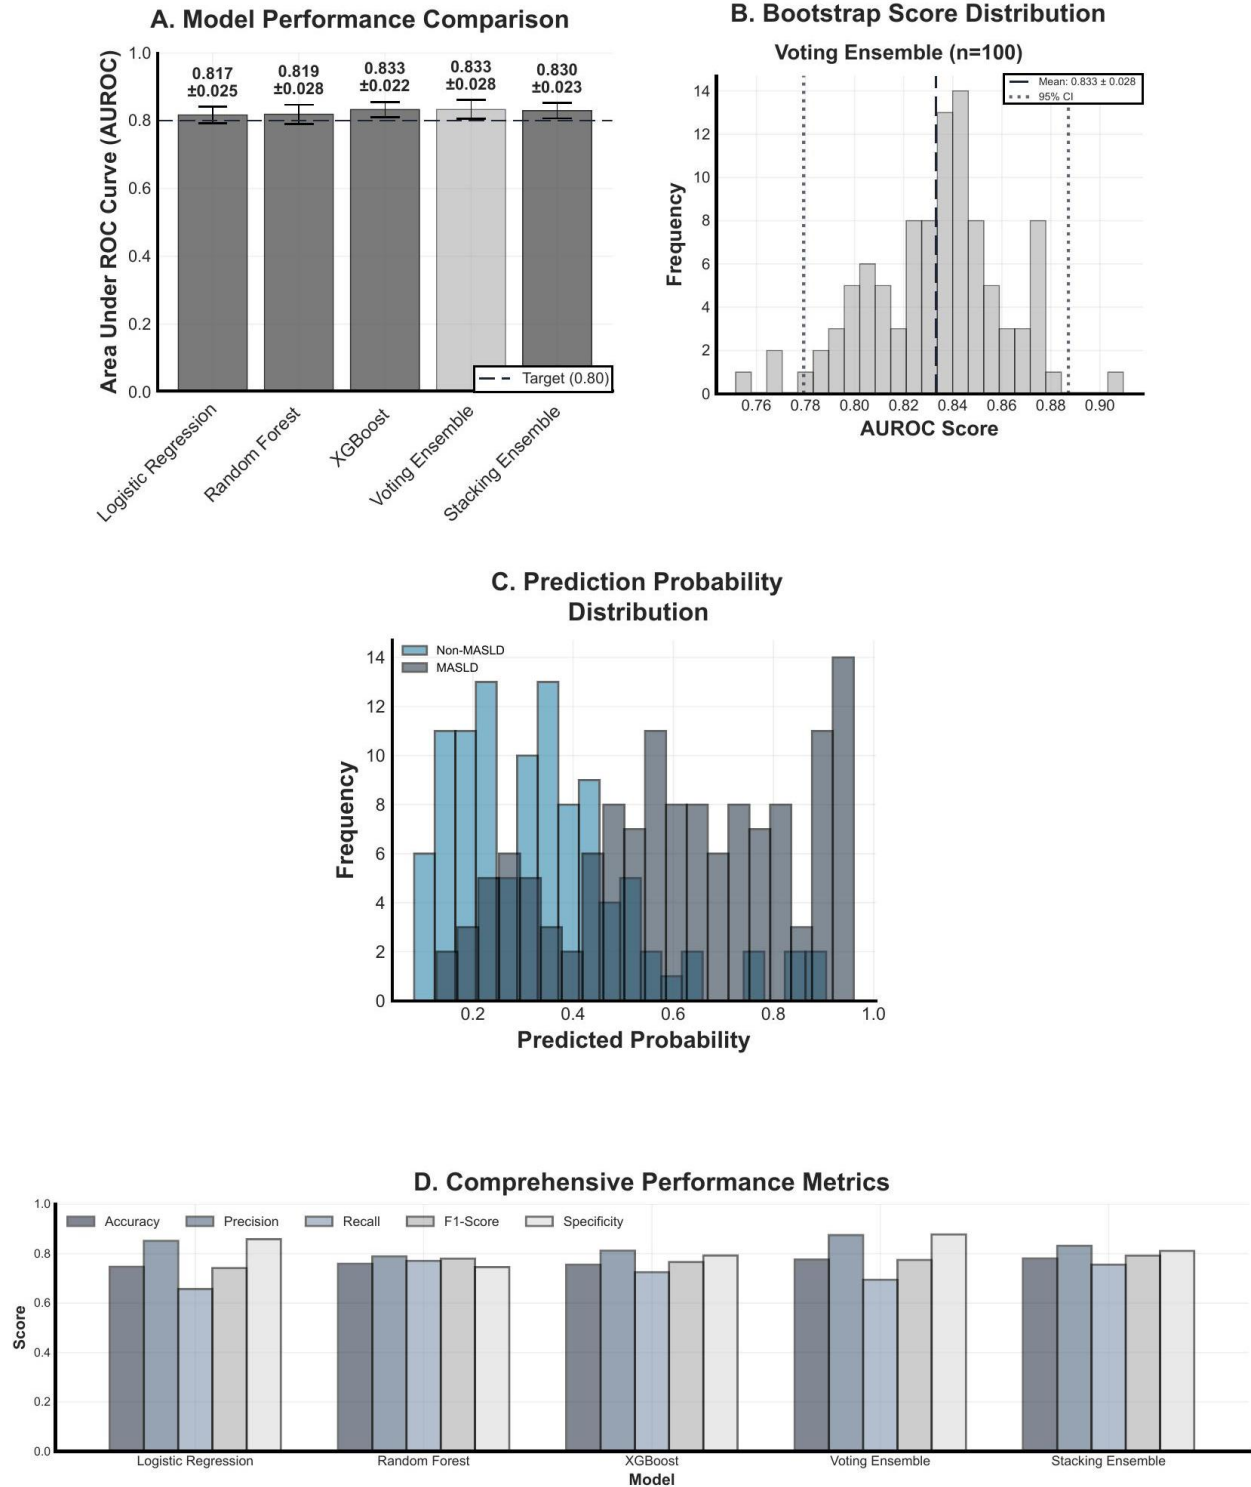

# Supplementary Figure S5

HFF-responder classification: supplementary performance analysis (model performance comparison).

## S5. Responders Classification: Supplementary Performance Analysis

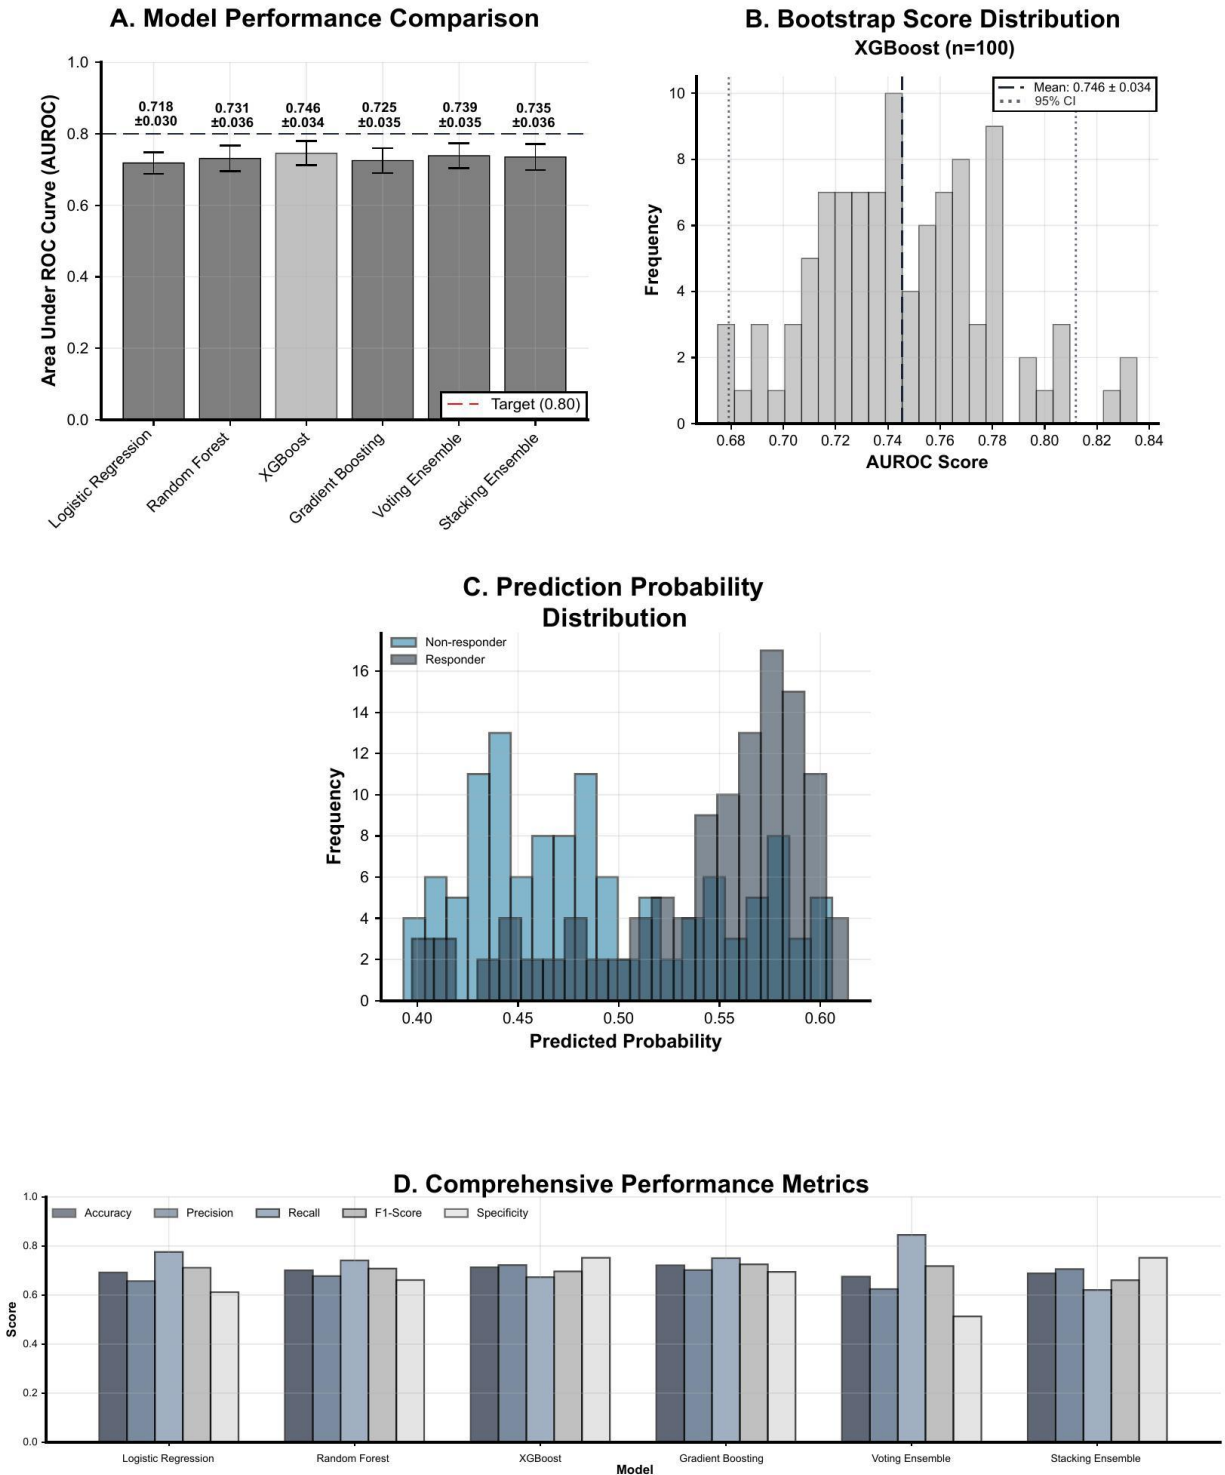

# Supplementary Figure S6

Positive (reduction-only) responders classification: supplementary performance analysis.

## S6. Positive Responders Classification: Supplementary Performance Analysis

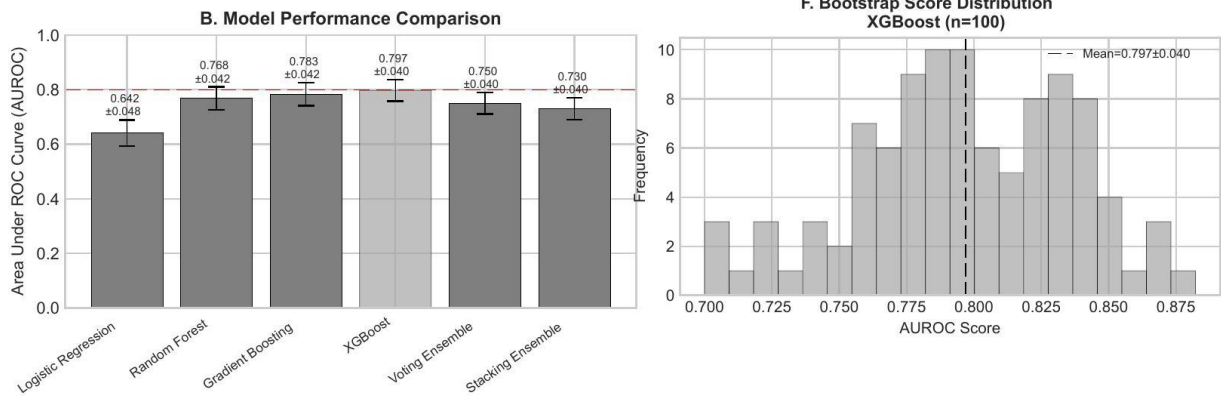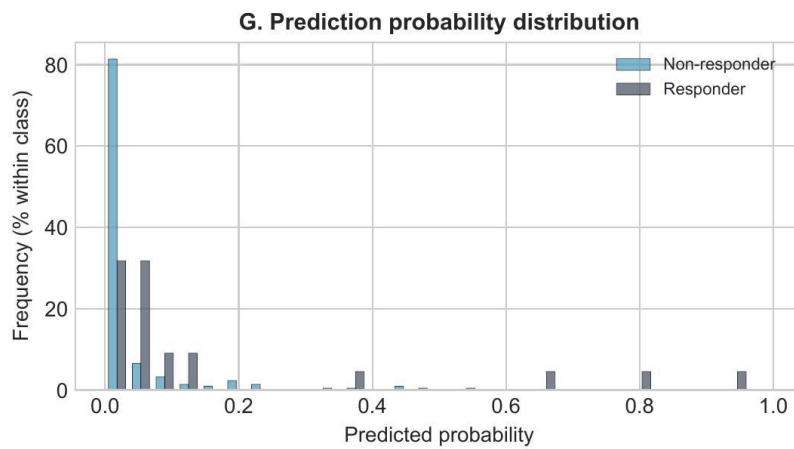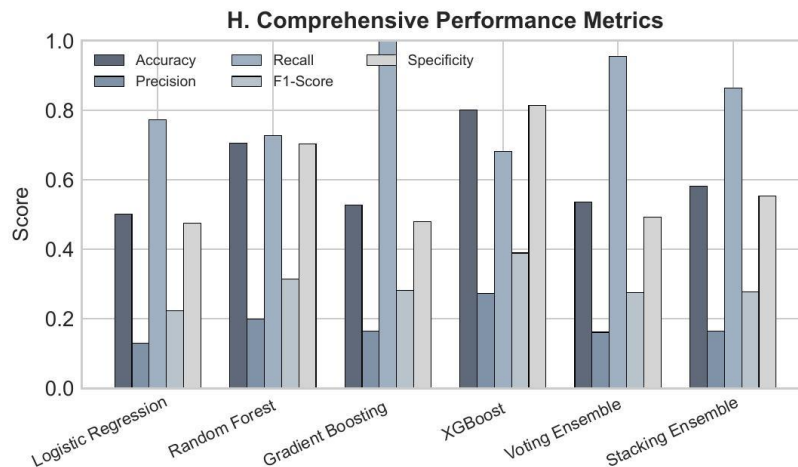

## Supplementary Figure S7

Sex-specific and untargeted-feature-set effect (DeLong's test p-values).

S7: Sex-Specific and Untargeted specific effect

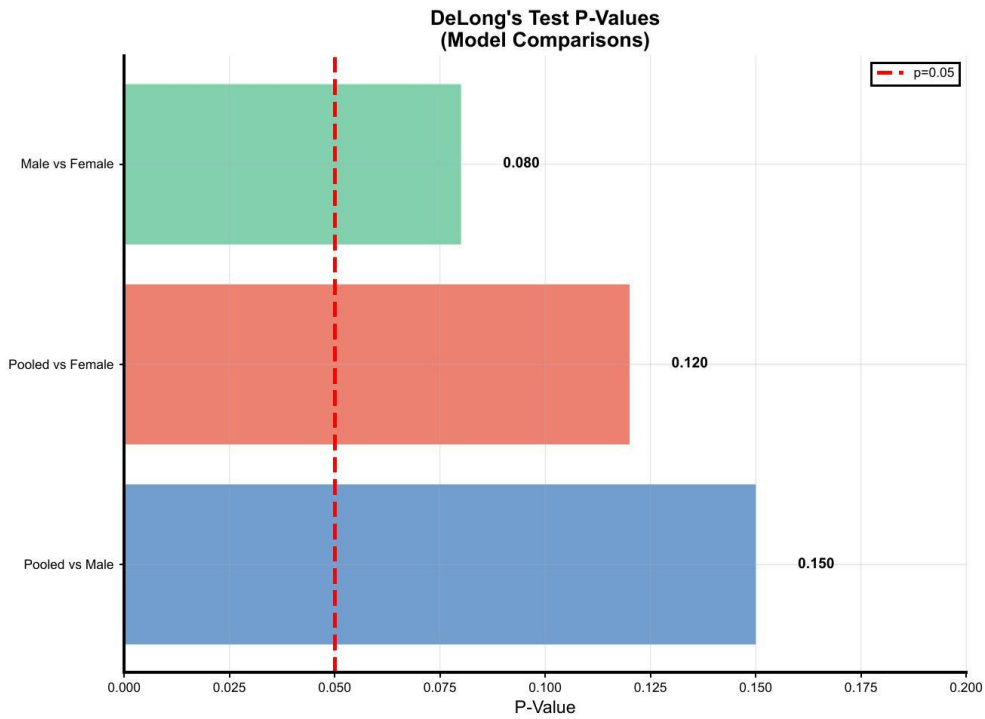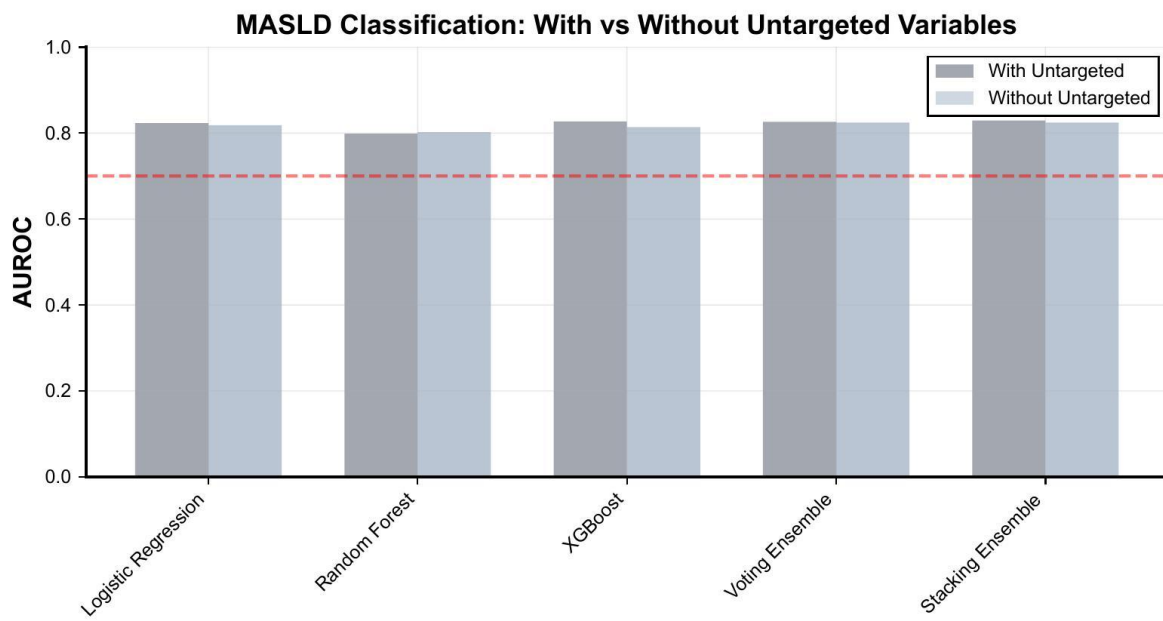

# Supplementary Figure S8

MASLD-responder classification performance without baseline MASLD-status feature.

## S8. MASLD Responder Classification: Performance Analysis (without baseline MASLD)

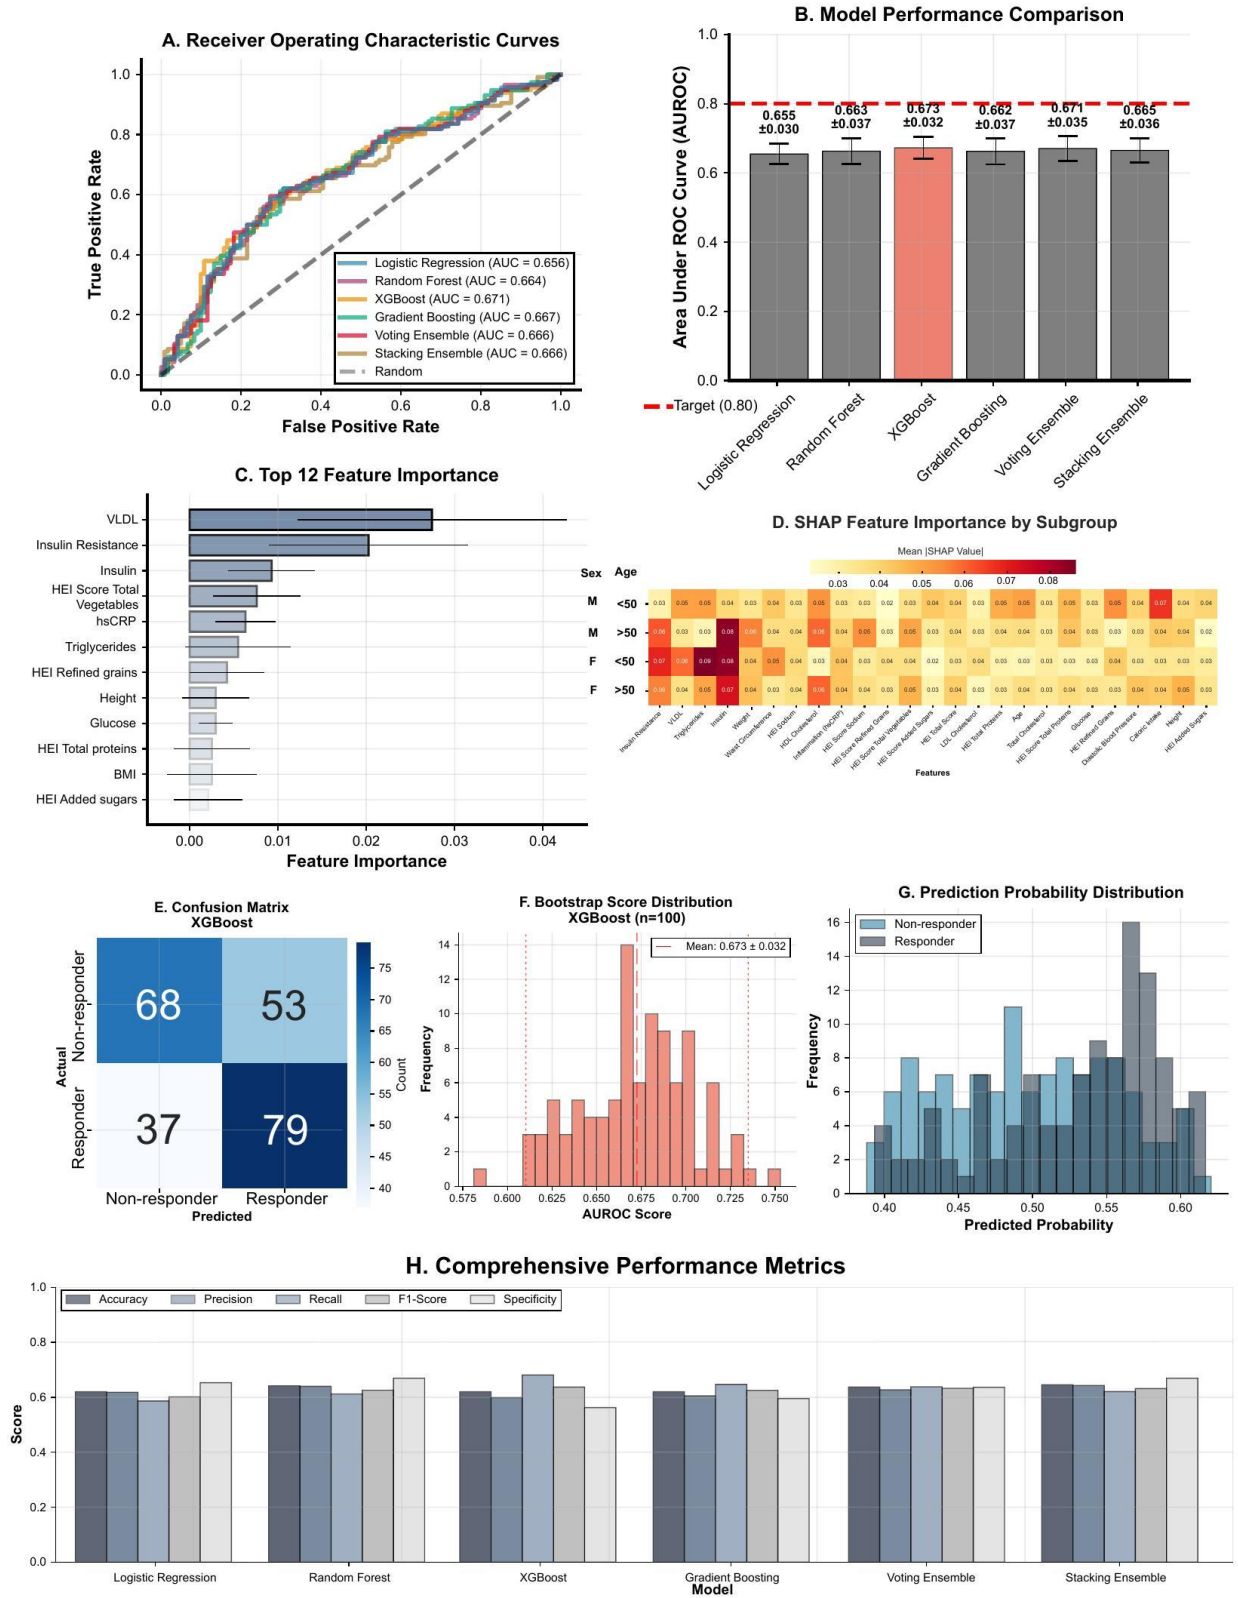

# Supplementary Figure S9

Calibration and reliability diagrams for MASLD classification.

## S9. Calibration and Reliability Diagram

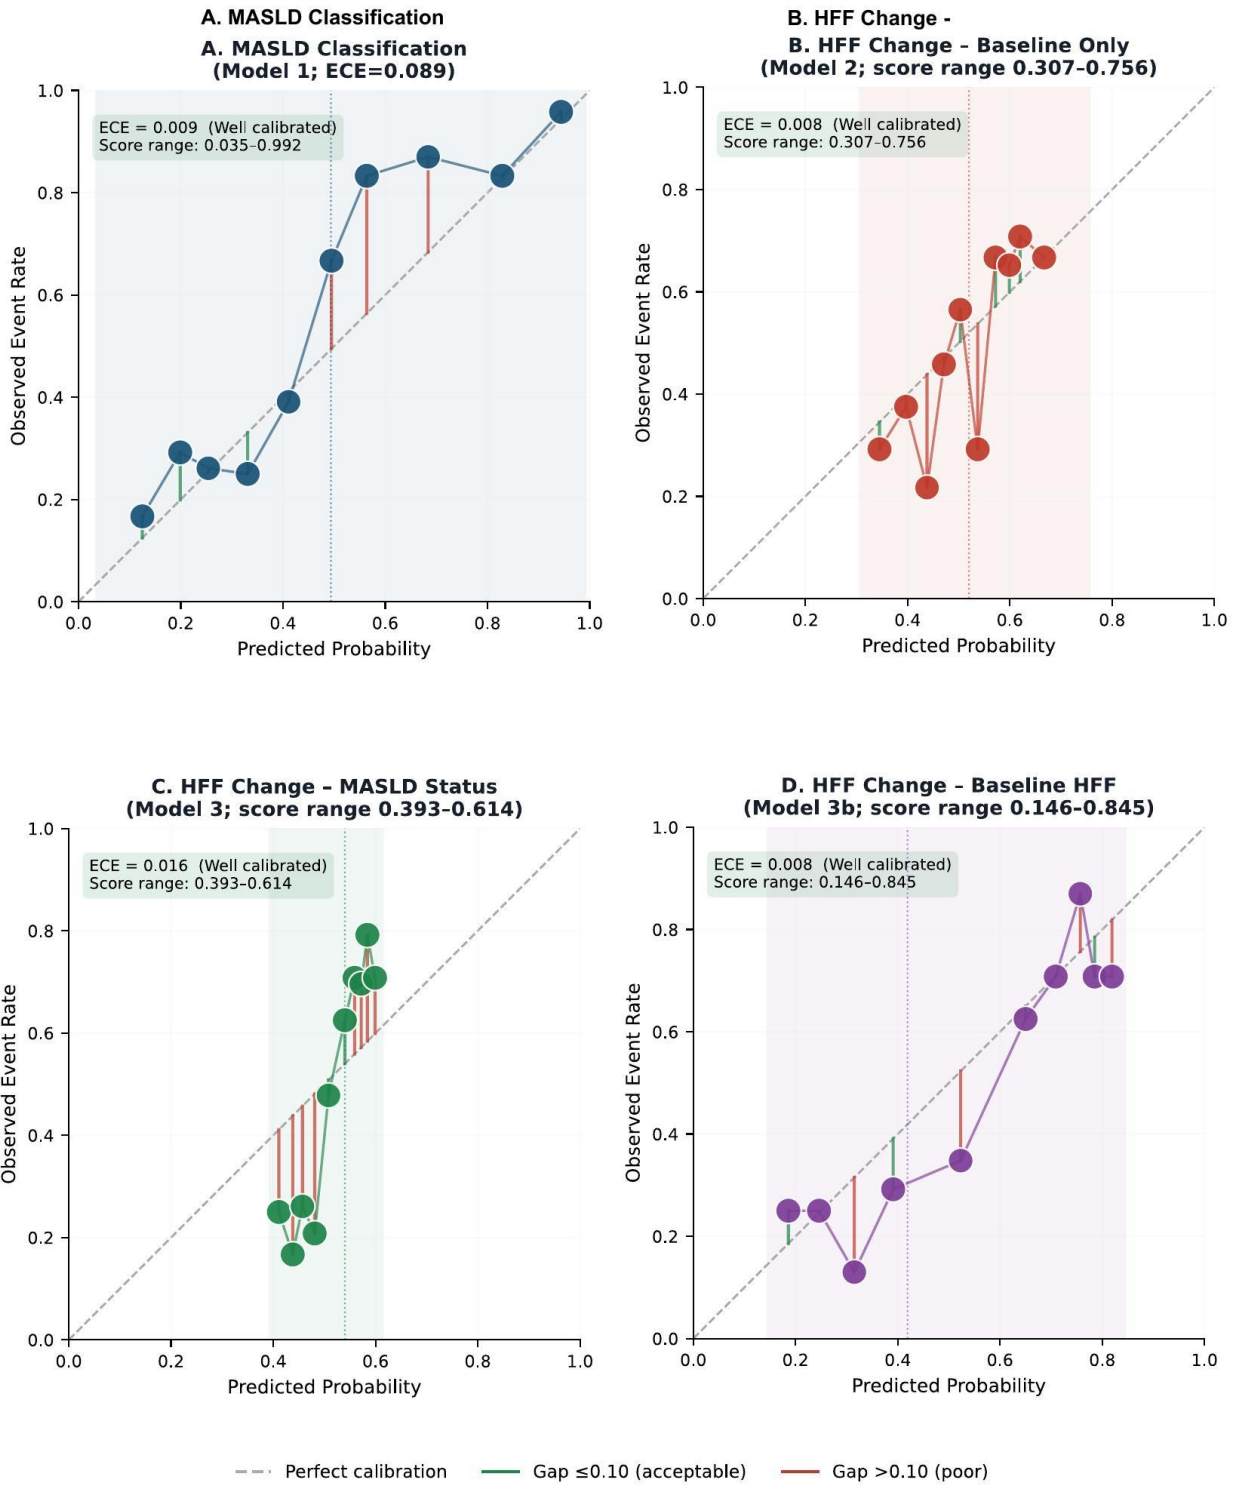

# Supplementary Figure S10

Obesity-stratified MASLD detection sensitivity analysis (BMI  $\geq 30$  vs  $< 30$ ).

### S10. Obesity-stratified MASLD detection sensitivity analysis

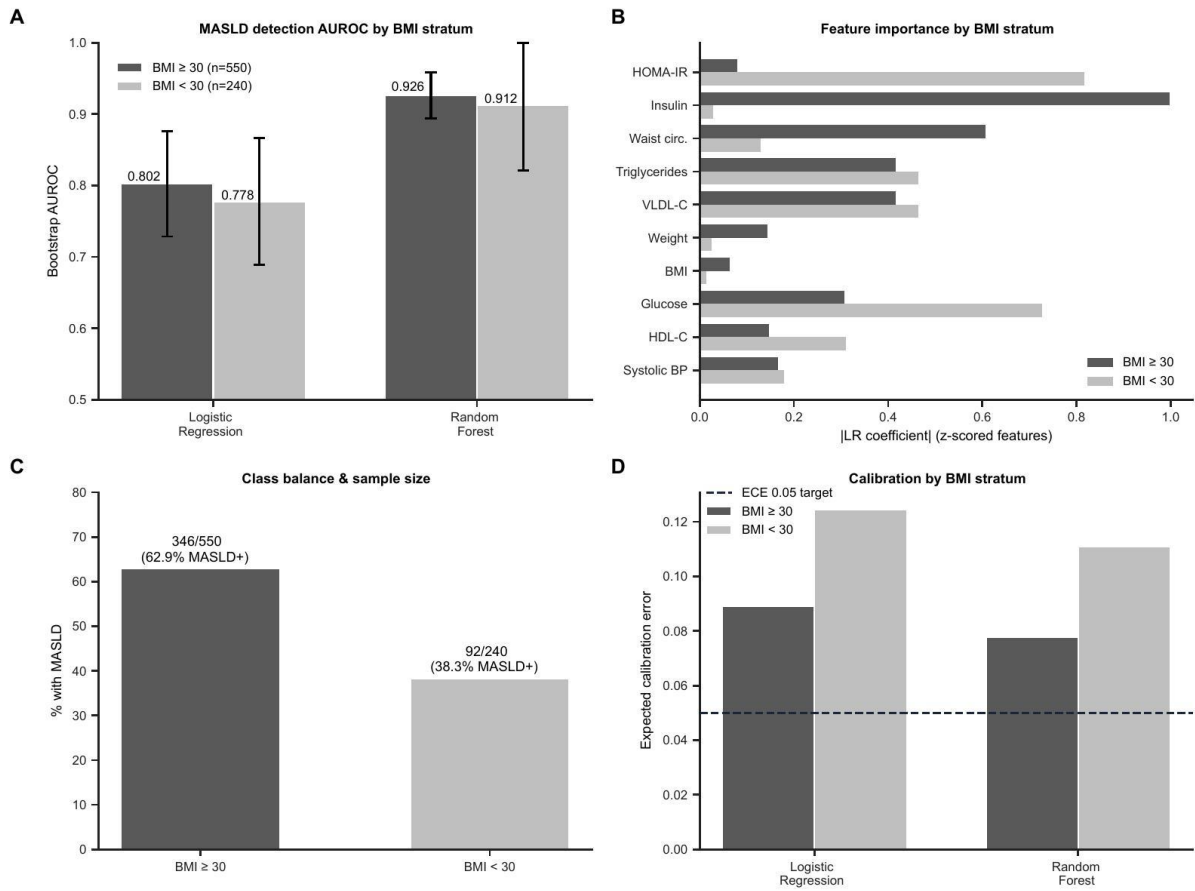

## Supplementary Table S1 - HFF Change Prediction Performance by Feature Set (embedded in main Results)

Bootstrapped AUROC (mean  $\pm$  SD, 95% CI) for HFF change prediction ( $\geq 5$  percentage point absolute change vs. stable) across four sequential feature branches. Each branch adds one predictor type to the baseline biomarker panel. Branch 4 adds both; the marginal gain over Branch 3 is minimal, supporting sufficiency of continuous baseline HFF.

| Feature Branch                                  | Best Model AUROC  | 95% CI      | Best Algorithm    | $\Delta$ vs. Branch 1 |
|-------------------------------------------------|-------------------|-------------|-------------------|-----------------------|
| Branch 1: Baseline biomarker panel only         | 0.676 $\pm$ 0.038 | 0.598–0.728 | Gradient Boosting | —                     |
| Branch 2: + MASLD status (binary, ground truth) | 0.746 $\pm$ 0.034 | 0.674–0.794 | XGBoost           | +0.070                |
| Branch 3: + Baseline HFF (continuous)           | $\approx$ 0.745   | 0.685–0.805 | Multiple          | +0.069                |
| Branch 4: + MASLD status and Baseline HFF       | $\approx$ 0.747   | 0.686–0.808 | Multiple          | +0.071                |

AUROC = area under the receiver operating characteristic curve; CI = confidence interval; HFF = hepatic fat fraction; MASLD = metabolic dysfunction–associated steatotic liver disease.  $\Delta$  = difference in best AUROC vs. Branch 1.

## Supplementary Table S2. MASLD Classification and HFF Change Prediction: Targeted vs. Untargeted Lipidomic Variables

Bootstrapped AUROC ( $\pm$ SD) for MASLD classification and HFF change prediction ( $\geq 5$  percentage point absolute change) using targeted clinical and lipidomic variables only versus the same pipeline with untargeted lipidomic variables additionally included. Both analyses used 10 selected features; n=790 for MASLD classification and n=723 for HFF change prediction.

|                                     | Targeted AUROC ( $\pm$ SD) | Untargeted AUROC ( $\pm$ SD) | $\Delta$ AUROC | Interpretation |
|-------------------------------------|----------------------------|------------------------------|----------------|----------------|
| <b><u>MASLD Classification</u></b>  |                            |                              |                |                |
| Logistic Regression                 | 0.807 $\pm$ 0.026          | 0.813 $\pm$ 0.025            | +0.006         | Negligible     |
| Random Forest                       | 0.823 $\pm$ 0.026          | 0.824 $\pm$ 0.026            | +0.001         | Negligible     |
| XGBoost                             | 0.818 $\pm$ 0.027          | 0.818 $\pm$ 0.027            | 0.000          | None           |
| Voting Ensemble                     | 0.826 $\pm$ 0.023          | 0.828 $\pm$ 0.023            | +0.002         | Negligible     |
| Stacking Ensemble                   | 0.827 $\pm$ 0.027          | 0.830 $\pm$ 0.027            | +0.003         | Negligible     |
| <b><u>HFF Change Prediction</u></b> |                            |                              |                |                |
| Logistic Regression                 | 0.653 $\pm$ 0.036          | 0.674 $\pm$ 0.037            | +0.021         | Modest         |
| Random Forest                       | 0.663 $\pm$ 0.032          | 0.695 $\pm$ 0.032            | +0.032         | Modest         |
| XGBoost                             | 0.658 $\pm$ 0.035          | 0.689 $\pm$ 0.034            | +0.031         | Modest         |
| Gradient Boosting                   | 0.676 $\pm$ 0.038          | 0.690 $\pm$ 0.037            | +0.014         | Modest         |
| Voting Ensemble                     | 0.670 $\pm$ 0.030          | 0.694 $\pm$ 0.030            | +0.024         | Modest         |

AUROC = area under the receiver operating characteristic curve; SD = standard deviation;  $\Delta$  = difference (Untargeted minus Targeted). All values from 100-iteration bootstrap validation. "Negligible" =  $\Delta$ AUROC  $<$ 0.01; "Modest" =  $\Delta$ AUROC 0.01–0.04. Targeted = clinical and targeted lipidomic variables only. Untargeted = same pipeline with untargeted lipidomic metabolites additionally included.

### S3 Supplementary Table S3 - Model Hyperparameter and Regularization Specifications

| Analysis_function                          | Task_type                            | Model               | Estimator_base                                                                      | Search_space                                                                                                                                                                                                      | Regularization_or_imbalance                                    | CV_and_scoring                                                          | Notes                                                                                                             |
|--------------------------------------------|--------------------------------------|---------------------|-------------------------------------------------------------------------------------|-------------------------------------------------------------------------------------------------------------------------------------------------------------------------------------------------------------------|----------------------------------------------------------------|-------------------------------------------------------------------------|-------------------------------------------------------------------------------------------------------------------|
| optimize_hyperparameters                   | classification                       | Logistic Regression | LogisticRegression(max_iter=1000, class_weight=balanced for binary)                 | $C \sim \text{loguniform}(1e-3, 1e3)$ ; penalty $\in \{1, l2\}$ ; solver $\in \{\text{liblinear}, \text{saga}\}$                                                                                                  | L1/L2 regularization; class_weight and sample_weight balanced. | StratifiedKfold(cv_folds, shuffle=True); scoring=roc_auc or roc_auc_ovr | RandomizedSearch CV (or Optuna TPE when USE_OPTUNA=1); default N_ITER=48, CV=5.                                   |
| optimize_hyperparameters                   | classification                       | Random Forest       | RandomForestClassifier(class_weight=balanced, n_jobs=1)                             | n_estimators $\in [50, 500]$ ; max_depth $\in \{\text{None}, 5, 50\}$ ; min_samples_split $\in [2, 20]$ ; min_samples_leaf $\in [1, 15]$                                                                          | Implicit regularization via tree depth/split/leaf controls.    | StratifiedKfold; scoring=roc_auc/roc_auc_ovr                            | RandomizedSearch CV (or Optuna TPE when USE_OPTUNA=1); default N_ITER=48, CV=5.                                   |
| optimize_hyperparameters                   | classification                       | XGBoost             | XGBClassifier(eval_metric=logloss; scale_pos_weight for binary imbalance)           | n_estimators $\in [50, 500]$ ; max_depth $\in [3, 15]$ ; learning_rate $\sim \text{loguniform}(1e-3, 0.5)$ ; subsample $\sim U(0.6, 1.0)$ ; colsample_bytree $\sim U(0.6, 1.0)$                                   | Imbalance handled via scale_pos_weight + sample_weight.        | StratifiedKfold; scoring=roc_auc/roc_auc_ovr                            | RandomizedSearch CV (or Optuna TPE when USE_OPTUNA=1); default N_ITER=48, CV=5.                                   |
| optimize_hyperparameters                   | regression                           | Ridge               | Ridge(random_state=42)                                                              | alpha $\sim \text{loguniform}(1e-2, 1e3)$                                                                                                                                                                         | L2 regularization via alpha.                                   | K-fold cv_folds; scoring=r2                                             | RandomizedSearch CV (or Optuna TPE when USE_OPTUNA=1); default N_ITER=48, CV=5.                                   |
| optimize_hyperparameters_for_change_models | classification (responder / 3-group) | Logistic Regression | LogisticRegression(max_iter=2000, class_weight=balanced)                            | $C \sim \text{loguniform}(1e-3, 1e3)$ ; penalty fixed to l2; solver $\in \{\text{lbfgs}, \text{saga}\}$                                                                                                           | L2 regularization; balanced class/sample weighting.            | RepeatedStratifiedKfold; scoring=roc_auc or roc_auc_ovr                 | RandomizedSearch CV (or Optuna TPE); default N_ITER=50 with RepeatedStratifiedKfold (5 folds $\times$ 2 repeats). |
| optimize_hyperparameters_for_change_models | classification (responder / 3-group) | XGBoost             | XGBClassifier(eval_metric=logloss/mlogloss; objective multisoftprob for multiclass) | n_estimators $\in [100, 500]$ ; max_depth $\in [3, 15]$ ; learning_rate $\sim \text{loguniform}(1e-3, 0.5)$ ; subsample $\sim U(0.6, 1.0)$ ; colsample_bytree $\sim U(0.6, 1.0)$ ; min_child_weight $\in [1, 10]$ | scale_pos_weight for binary imbalance; sample_weight balanced. | RepeatedStratifiedKfold; scoring=roc_auc or roc_auc_ovr                 | RandomizedSearch CV (or Optuna TPE); default N_ITER=50 with RepeatedStratifiedKfold (5 folds $\times$ 2 repeats). |
| optimize_hyperparameters_for_change_models | classification (responder / 3-group) | Gradient Boosting   | GradientBoostingClassifier(random_state=42)                                         | n_estimators $\in [50, 350]$ ; max_depth $\in [2, 10]$ ; learning_rate $\sim \text{loguniform}(1e-3, 0.3)$ ; min_samples_split $\in [2, 20]$ ; min_samples_leaf $\in [1, 15]$ ; subsample $\sim U(0.6, 1.0)$      | Regularization via depth/leaf/subsample/learning_rate.         | RepeatedStratifiedKfold; scoring=roc_auc or roc_auc_ovr                 | RandomizedSearch CV (or Optuna TPE); default N_ITER=50 with RepeatedStratifiedKfold (5 folds $\times$ 2 repeats). |
| ensembles                                  | classification                       | Voting + Stacking   | VotingClassifier(voting=soft) and StackingClassifier(meta=LogisticRegression)       | No separate search; built from optimized base estimators                                                                                                                                                          | Meta learner class_weight balanced                             | Stacking cv=3 (main) or cv=5 (change models)                            | Added when $\geq 2$ optimized base models available.                                                              |

## Supplementary Table S4 - Master Variable Codebook and Baseline Missingness

| Variable Name             | Common Name                                 | Category          | Baseline Missing (%) | Description                                                                  |
|---------------------------|---------------------------------------------|-------------------|----------------------|------------------------------------------------------------------------------|
| cuffsize_wk0              | Blood Pressure Cuff Size                    | Anthropometric    | 0                    | Feature in category 'Anthropometric' at baseline (week 0).                   |
| BMI_wk0                   | Body Mass Index (BMI)                       | Anthropometric    | 0                    | Feature in category 'Anthropometric' at baseline (week 0).                   |
| wstcircavg_wk0            | Waist Circumference                         | Anthropometric    | 0                    | Feature in category 'Anthropometric' at baseline (week 0).                   |
| weightavg_wk0             | Weight (baseline)                           | Anthropometric    | 0                    | Feature in category 'Anthropometric' at baseline (week 0).                   |
| diasmean_wk0              | diasmean (baseline)                         | Anthropometric    | 0                    | Feature in category 'Anthropometric' at baseline (week 0).                   |
| heights_wk0               | heights (baseline)                          | Anthropometric    | 0                    | Feature in category 'Anthropometric' at baseline (week 0).                   |
| pulsmean_wk0              | pulsmean (baseline)                         | Anthropometric    | 0                    | Feature in category 'Anthropometric' at baseline (week 0).                   |
| sysmean_wk0               | sysmean (baseline)                          | Anthropometric    | 0                    | Feature in category 'Anthropometric' at baseline (week 0).                   |
| chol_wk0                  | Cholesterol (baseline)                      | Clinical Labs     | 0                    | Feature in category 'Clinical Labs' at baseline (week 0).                    |
| Insulin_wk0               | Fasting Insulin                             | Clinical Labs     | 0                    | Metabolic biomarker (Clinical Labs) at baseline (week 0).                    |
| glucose_wk0               | Glucose (baseline)                          | Clinical Labs     | 0                    | Metabolic biomarker (Clinical Labs) at baseline (week 0).                    |
| hdl_wk0                   | HDL (baseline)                              | Clinical Labs     | 0                    | Feature in category 'Clinical Labs' at baseline (week 0).                    |
| HOMA-IR_wk0               | HOMA-IR (baseline)                          | Clinical Labs     | 0                    | Metabolic biomarker (Clinical Labs) at baseline (week 0).                    |
| ldl_wk0                   | LDL (baseline)                              | Clinical Labs     | 0                    | Feature in category 'Clinical Labs' at baseline (week 0).                    |
| trig_wk0                  | Triglycerides (baseline)                    | Clinical Labs     | 0                    | Feature in category 'Clinical Labs' at baseline (week 0).                    |
| vldl_wk0                  | VLDL (baseline)                             | Clinical Labs     | 0                    | Feature in category 'Clinical Labs' at baseline (week 0).                    |
| hsCRP_wk0                 | hsCRP (baseline)                            | Clinical Labs     | 0                    | Feature in category 'Clinical Labs' at baseline (week 0).                    |
| rikcal_wk0                | rikcal (baseline)                           | Clinical Labs     | 0                    | Feature in category 'Clinical Labs' at baseline (week 0).                    |
| age_wk0                   | age (baseline)                              | Demographics      | 0                    | Demographic covariate (Demographics); encoded for modeling where applicable. |
| education_wk0             | education (baseline)                        | Demographics      | 0                    | Feature in category 'Demographics' at baseline (week 0).                     |
| livingsituation_wk0       | livingsituation (baseline)                  | Demographics      | 0                    | Feature in category 'Demographics' at baseline (week 0).                     |
| occupation_wk0            | occupation (baseline)                       | Demographics      | 0                    | Feature in category 'Demographics' at baseline (week 0).                     |
| weight_wk0                | Weight                                      | Derived/Other     | 0                    | Feature in category 'Derived/Other' at baseline (week 0).                    |
| xhei_fatacid_wk0          | Fatty Acids (HEI component) (RBC, baseline) | HEI Components    | 0                    | Feature in category 'HEI Components' at baseline (week 0).                   |
| HEI2015_TOTAL_SCORE_wk0   | HEI-2015 total (baseline)                   | HEI Components    | 0                    | Feature in category 'HEI Components' at baseline (week 0).                   |
| HEIX10_SODIUM_wk0         | HEIX10_SODIUM (baseline)                    | HEI Components    | 0                    | Feature in category 'HEI Components' at baseline (week 0).                   |
| HEIX11_REFINEDGRAIN_wk0   | HEIX11_REFINEDGRAIN (baseline)              | HEI Components    | 0                    | Feature in category 'HEI Components' at baseline (week 0).                   |
| HEIX12_ADDEDSUGARS_wk0    | HEIX12_ADDEDSUGARS (baseline)               | HEI Components    | 0                    | Feature in category 'HEI Components' at baseline (week 0).                   |
| HEIX13_SATFATS_wk0        | HEIX13_SATFATS (baseline)                   | HEI Components    | 0                    | Feature in category 'HEI Components' at baseline (week 0).                   |
| HEIX1_TOTALVEG_wk0        | HEIX1_TOTALVEG (baseline)                   | HEI Components    | 0                    | Feature in category 'HEI Components' at baseline (week 0).                   |
| HEIX2_GREEN_AND_BEAN_wk0  | HEIX2_GREEN_AND_BEAN (baseline)             | HEI Components    | 0                    | Feature in category 'HEI Components' at baseline (week 0).                   |
| HEIX3_TOTALFRUIT_wk0      | HEIX3_TOTALFRUIT (baseline)                 | HEI Components    | 0                    | Feature in category 'HEI Components' at baseline (week 0).                   |
| HEIX4_WHOLEFRUIT_wk0      | HEIX4_WHOLEFRUIT (baseline)                 | HEI Components    | 0                    | Feature in category 'HEI Components' at baseline (week 0).                   |
| HEIX5_WHOLEGRAIN_wk0      | HEIX5_WHOLEGRAIN (baseline)                 | HEI Components    | 0                    | Feature in category 'HEI Components' at baseline (week 0).                   |
| HEIX6_TOTALDAIRY_wk0      | HEIX6_TOTALDAIRY (baseline)                 | HEI Components    | 0                    | Feature in category 'HEI Components' at baseline (week 0).                   |
| HEIX7_TOTPROT_wk0         | HEIX7_TOTPROT (baseline)                    | HEI Components    | 0                    | Feature in category 'HEI Components' at baseline (week 0).                   |
| HEIX8_SEAPLANT_PROT_wk0   | HEIX8_SEAPLANT_PROT (baseline)              | HEI Components    | 0                    | Feature in category 'HEI Components' at baseline (week 0).                   |
| HEIX9_FATTYACID_wk0       | HEIX9_FATTYACID (baseline)                  | HEI Components    | 0                    | Feature in category 'HEI Components' at baseline (week 0).                   |
| hei_addedsugars_wk0       | hei_addedsugars (baseline)                  | HEI Components    | 0                    | Feature in category 'HEI Components' at baseline (week 0).                   |
| hei_dairy_wk0             | hei_dairy (baseline)                        | HEI Components    | 0                    | Feature in category 'HEI Components' at baseline (week 0).                   |
| hei_greensbeans_wk0       | hei_greensbeans (baseline)                  | HEI Components    | 0                    | Feature in category 'HEI Components' at baseline (week 0).                   |
| hei_refinedgrains_wk0     | hei_refinedgrains (baseline)                | HEI Components    | 0                    | Feature in category 'HEI Components' at baseline (week 0).                   |
| hei_seafoodplantprot_wk0  | hei_seafoodplantprot (baseline)             | HEI Components    | 0                    | Feature in category 'HEI Components' at baseline (week 0).                   |
| hei_sodium_wk0            | hei_sodium (baseline)                       | HEI Components    | 0                    | Feature in category 'HEI Components' at baseline (week 0).                   |
| hei_totfruit_wk0          | hei_totfruit (baseline)                     | HEI Components    | 0                    | Feature in category 'HEI Components' at baseline (week 0).                   |
| hei_totproteins_wk0       | hei_totproteins (baseline)                  | HEI Components    | 0                    | Feature in category 'HEI Components' at baseline (week 0).                   |
| hei_wholefruit_wk0        | hei_wholefruit (baseline)                   | HEI Components    | 0                    | Feature in category 'HEI Components' at baseline (week 0).                   |
| hei_wholegrains_wk0       | hei_wholegrains (baseline)                  | HEI Components    | 0                    | Feature in category 'HEI Components' at baseline (week 0).                   |
| xhei_addedsugars_wk0      | xhei_addedsugars (baseline)                 | HEI Components    | 0                    | Feature in category 'HEI Components' at baseline (week 0).                   |
| xhei_dairy_wk0            | xhei_dairy (baseline)                       | HEI Components    | 0                    | Feature in category 'HEI Components' at baseline (week 0).                   |
| xhei_greensbeans_wk0      | xhei_greensbeans (baseline)                 | HEI Components    | 0                    | Feature in category 'HEI Components' at baseline (week 0).                   |
| xhei_refinedgrains_wk0    | xhei_refinedgrains (baseline)               | HEI Components    | 0                    | Feature in category 'HEI Components' at baseline (week 0).                   |
| xhei_satfats_wk0          | xhei_satfats (baseline)                     | HEI Components    | 0                    | Feature in category 'HEI Components' at baseline (week 0).                   |
| xhei_seafoodplantprot_wk0 | xhei_seafoodplantprot (baseline)            | HEI Components    | 0                    | Feature in category 'HEI Components' at baseline (week 0).                   |
| xhei_sodium_wk0           | xhei_sodium (baseline)                      | HEI Components    | 0                    | Feature in category 'HEI Components' at baseline (week 0).                   |
| xhei_totfruit_wk0         | xhei_totfruit (baseline)                    | HEI Components    | 0                    | Feature in category 'HEI Components' at baseline (week 0).                   |
| xhei_totproteins_wk0      | xhei_totproteins (baseline)                 | HEI Components    | 0                    | Feature in category 'HEI Components' at baseline (week 0).                   |
| xhei_totveg_wk0           | xhei_totveg (baseline)                      | HEI Components    | 0                    | Feature in category 'HEI Components' at baseline (week 0).                   |
| xhei_wholefruit_wk0       | xhei_wholefruit (baseline)                  | HEI Components    | 0                    | Feature in category 'HEI Components' at baseline (week 0).                   |
| xhei_wholegrains_wk0      | xhei_wholegrains (baseline)                 | HEI Components    | 0                    | Feature in category 'HEI Components' at baseline (week 0).                   |
| Diabetes_wk0              | Diabetes (baseline)                         | Health Conditions | 0                    | Feature in category 'Health Conditions' at baseline (week 0).                |
| allergy_food_wk0          | allergy_food (baseline)                     | Health Conditions | 0                    | Feature in category 'Health Conditions' at baseline (week 0).                |
| allergy_meds_wk0          | allergy_meds (baseline)                     | Health Conditions | 0                    | Feature in category 'Health Conditions' at baseline (week 0).                |
| allergy_other_wk0         | allergy_other (baseline)                    | Health Conditions | 0                    | Feature in category 'Health Conditions' at baseline (week 0).                |
| allergy_seasonal_wk0      | allergy_seasonal (baseline)                 | Health Conditions | 0                    | Feature in category 'Health Conditions' at baseline (week 0).                |
| chew_wk0                  | chew (baseline)                             | Health Conditions | 0                    | Feature in category 'Health Conditions' at baseline (week 0).                |
| choke_wk0                 | choke (baseline)                            | Health Conditions | 0                    | Feature in category 'Health Conditions' at baseline (week 0).                |
| condition_wk0             | condition (baseline)                        | Health Conditions | 0                    | Feature in category 'Health Conditions' at baseline (week 0).                |
| diet_prescribed_wk0       | diet_prescribed (baseline)                  | Health Conditions | 0                    | Feature in category 'Health Conditions' at baseline (week 0).                |

|                      |                                                        |             |   |                                                       |
|----------------------|--------------------------------------------------------|-------------|---|-------------------------------------------------------|
| meals_day_wk0        | meals_day (baseline)                                   | Lifestyle   | 0 | Feature in category 'Lifestyle' at baseline (week 0). |
| meals_delivered_wk0  | meals_delivered (baseline)                             | Lifestyle   | 0 | Feature in category 'Lifestyle' at baseline (week 0). |
| meals_home_wk0       | meals_home (baseline)                                  | Lifestyle   | 0 | Feature in category 'Lifestyle' at baseline (week 0). |
| meals_other_wk0      | meals_other (baseline)                                 | Lifestyle   | 0 | Feature in category 'Lifestyle' at baseline (week 0). |
| meals_restaurant_wk0 | meals_restaurant (baseline)                            | Lifestyle   | 0 | Feature in category 'Lifestyle' at baseline (week 0). |
| meals_sites_wk0      | meals_sites (baseline)                                 | Lifestyle   | 0 | Feature in category 'Lifestyle' at baseline (week 0). |
| meals_work_wk0       | meals_work (baseline)                                  | Lifestyle   | 0 | Feature in category 'Lifestyle' at baseline (week 0). |
| nowsmoke_wk0         | nowsmoke (baseline)                                    | Lifestyle   | 0 | Feature in category 'Lifestyle' at baseline (week 0). |
| prepare_special_wk0  | prepare_special (baseline)                             | Lifestyle   | 0 | Feature in category 'Lifestyle' at baseline (week 0). |
| reg_activity_wk0     | reg_activity (baseline)                                | Lifestyle   | 0 | Feature in category 'Lifestyle' at baseline (week 0). |
| smoked100_wk0        | smoked100 (baseline)                                   | Lifestyle   | 0 | Feature in category 'Lifestyle' at baseline (week 0). |
| snacks_day_wk0       | snacks_day (baseline)                                  | Lifestyle   | 0 | Feature in category 'Lifestyle' at baseline (week 0). |
| special_diet_wk0     | special_diet (baseline)                                | Lifestyle   | 0 | Feature in category 'Lifestyle' at baseline (week 0). |
| PUFA22_4n_6_wk0      | Adrenic Acid                                           | Targeted_FA | 0 | Targeted RBC fatty-acid feature at baseline (week 0). |
| PUFA18_3n_3_wk0      | Alpha-linolenic Acid (ALA)                             | Targeted_FA | 0 | Targeted RBC fatty-acid feature at baseline (week 0). |
| SFA20_0_wk0          | Arachidic Acid                                         | Targeted_FA | 0 | Targeted RBC fatty-acid feature at baseline (week 0). |
| PUFA20_4n_6_wk0      | Arachidonic Acid (AA)                                  | Targeted_FA | 0 | Targeted RBC fatty-acid feature at baseline (week 0). |
| SFA22_0_wk0          | Behenic Acid                                           | Targeted_FA | 0 | Targeted RBC fatty-acid feature at baseline (week 0). |
| SFA10_0_wk0          | Capric Acid                                            | Targeted_FA | 0 | Targeted RBC fatty-acid feature at baseline (week 0). |
| TFA18_2CLA_wk0       | Conjugated Linoleic Acid                               | Targeted_FA | 0 | Targeted RBC fatty-acid feature at baseline (week 0). |
| PUFA20_3n_6_wk0      | Dihomo-gamma-linolenic Acid (DGLA)                     | Targeted_FA | 0 | Targeted RBC fatty-acid feature at baseline (week 0). |
| PUFA22_2n_6_wk0      | Docosadienoic Acid                                     | Targeted_FA | 0 | Targeted RBC fatty-acid feature at baseline (week 0). |
| PUFA22_6n_3_wk0      | Docosahexaenoic Acid (DHA)                             | Targeted_FA | 0 | Targeted RBC fatty-acid feature at baseline (week 0). |
| PUFA22_5n_3_wk0      | Docosapentaenoic Acid (DPA)                            | Targeted_FA | 0 | Targeted RBC fatty-acid feature at baseline (week 0). |
| PUFA20_5n_3_wk0      | Eicosapentaenoic Acid (EPA)                            | Targeted_FA | 0 | Targeted RBC fatty-acid feature at baseline (week 0). |
| TFA18_1n_9T_wk0      | Elaidic Acid (Trans-oleic acid)                        | Targeted_FA | 0 | Targeted RBC fatty-acid feature at baseline (week 0). |
| MFA22_1n_9_wk0       | Erucic Acid                                            | Targeted_FA | 0 | Targeted RBC fatty-acid feature at baseline (week 0). |
| PUFA18_3n_6_wk0      | Gamma-linolenic Acid (GLA)                             | Targeted_FA | 0 | Targeted RBC fatty-acid feature at baseline (week 0). |
| MFA20_1n_9_wk0       | Gondoic Acid                                           | Targeted_FA | 0 | Targeted RBC fatty-acid feature at baseline (week 0). |
| SFA12_0_wk0          | Lauric Acid                                            | Targeted_FA | 0 | Targeted RBC fatty-acid feature at baseline (week 0). |
| SFA24_0_wk0          | Lignoceric Acid                                        | Targeted_FA | 0 | Targeted RBC fatty-acid feature at baseline (week 0). |
| PUFA18_2n_6_wk0      | Linoleic Acid (LA)                                     | Targeted_FA | 0 | Targeted RBC fatty-acid feature at baseline (week 0). |
| SFA14_0_wk0          | Myristic Acid                                          | Targeted_FA | 0 | Targeted RBC fatty-acid feature at baseline (week 0). |
| MFA24_1n_9_wk0       | Nervonic Acid                                          | Targeted_FA | 0 | Targeted RBC fatty-acid feature at baseline (week 0). |
| MFA18_1n_9_wk0       | Oleic Acid                                             | Targeted_FA | 0 | Targeted RBC fatty-acid feature at baseline (week 0). |
| PUFA22_5n_6_wk0      | Osbond Acid                                            | Targeted_FA | 0 | Targeted RBC fatty-acid feature at baseline (week 0). |
| SFA16_0_wk0          | Palmitic Acid                                          | Targeted_FA | 0 | Targeted RBC fatty-acid feature at baseline (week 0). |
| MFA16_1n_7_wk0       | Palmitoleic Acid                                       | Targeted_FA | 0 | Targeted RBC fatty-acid feature at baseline (week 0). |
| SFA15_0_wk0          | Pentadecanoic Acid                                     | Targeted_FA | 0 | Targeted RBC fatty-acid feature at baseline (week 0). |
| MFA16_1n_9_wk0       | Sapinic Acid                                           | Targeted_FA | 0 | Targeted RBC fatty-acid feature at baseline (week 0). |
| SFA18_0_wk0          | Stearic Acid                                           | Targeted_FA | 0 | Targeted RBC fatty-acid feature at baseline (week 0). |
| PUFA18_4n_3_wk0      | Stearidonic Acid (SDA)                                 | Targeted_FA | 0 | Targeted RBC fatty-acid feature at baseline (week 0). |
| PUFA_n_3_wk0         | Total Omega-3 Polyunsaturated Fatty Acids              | Targeted_FA | 0 | Targeted RBC fatty-acid feature at baseline (week 0). |
| PUFA_n_6_wk0         | Total Omega-6 Polyunsaturated Fatty Acids              | Targeted_FA | 0 | Targeted RBC fatty-acid feature at baseline (week 0). |
| SFA_wk0              | Total Saturated Fatty Acids                            | Targeted_FA | 0 | Targeted RBC fatty-acid feature at baseline (week 0). |
| Total_trans_wk0      | Total Trans Fatty Acids                                | Targeted_FA | 0 | Targeted RBC fatty-acid feature at baseline (week 0). |
| TFA16_1n_9T_wk0      | Trans-hexadecenoic Acid (16:1 n-9 trans)               | Targeted_FA | 0 | Targeted RBC fatty-acid feature at baseline (week 0). |
| TFA18_2T_wk0         | Trans-linoleic Acid Isomers (18:2 trans)               | Targeted_FA | 0 | Targeted RBC fatty-acid feature at baseline (week 0). |
| TFA18_1n10_12T_wk0   | Trans-octadecenoic Acid Isomers (18:1 n-10/n-12 trans) | Targeted_FA | 0 | Targeted RBC fatty-acid feature at baseline (week 0). |
| TFA16_1n_7T_wk0      | Trans-palmitoleic Acid                                 | Targeted_FA | 0 | Targeted RBC fatty-acid feature at baseline (week 0). |
| TFA18_1n_7T_wk0      | Trans-vaccenic Acid                                    | Targeted_FA | 0 | Targeted RBC fatty-acid feature at baseline (week 0). |
| MFA18_1n_7_wk0       | Vaccenic Acid                                          | Targeted_FA | 0 | Targeted RBC fatty-acid feature at baseline (week 0). |
| MUFA_wk0             | monounsaturated fatty acids (RBC, baseline)            | Targeted_FA | 0 | Targeted RBC fatty-acid feature at baseline (week 0). |

# Supplementary Table S5 - TRIPOD+AI Reporting Checklist

The 27-item TRIPOD+AI completed reporting checklist.

| TRIPOD+AI 2024 Checklist — HAT Trial MASLD Predictive Sub-Analysis                                                                                                                                              |        |                                  |                                                                                                                                                        |                                       |                                                                      |                                                                                                                                                                                                                                                 |
|-----------------------------------------------------------------------------------------------------------------------------------------------------------------------------------------------------------------|--------|----------------------------------|--------------------------------------------------------------------------------------------------------------------------------------------------------|---------------------------------------|----------------------------------------------------------------------|-------------------------------------------------------------------------------------------------------------------------------------------------------------------------------------------------------------------------------------------------|
| Reference: Collins GS, Moons KGM, Dhiman P, et al. TRIPOD+AI statement: updated guidance for reporting clinical prediction models that use regression or machine learning methods. <i>BMJ</i> 2024;385:e078378. |        |                                  |                                                                                                                                                        |                                       |                                                                      |                                                                                                                                                                                                                                                 |
| Section                                                                                                                                                                                                         | Item # | Topic                            | Requirement (TRIPOD+AI, Collins et al. 2024)                                                                                                           | Status                                | Location in manuscript                                               | Action required                                                                                                                                                                                                                                 |
| Title                                                                                                                                                                                                           | 1      | Title                            | Identify the study as a prediction-model study, including target population, outcome, and AI/ML use.                                                   | Complete                              | Title page                                                           | Title states machine-learning prediction of hepatic-fat response to MUFA-rich dietary intervention in MASLD and identifies secondary analysis of HAT randomized trial.                                                                          |
| Abstract                                                                                                                                                                                                        | 2      | Abstract                         | Summarize background, objectives, data source, participants, outcomes, predictors, sample size, model type, performance, calibration, and conclusions. | Complete with final consistency check | Abstract                                                             | Abstract reports HAT, n=790, MASLD classification AUROC, calibration ECE, HFF responder endpoints, Figure 7 AUROC, TRIPOD+AI, and need for external validation. Ensure endpoint wording matches Results: HFF_Responder vs ≥5 pp reduction-only. |
| Introduction                                                                                                                                                                                                    | 3a     | Background/rationale             | Explain clinical problem, why prediction is needed, and why AI/ML is appropriate.                                                                      | Complete                              | Introduction paragraphs 1–4                                          | Introduction describes MASLD heterogeneity, neutral parent trial average effects, precision nutrition rationale, and ML use for nonlinear/heterogeneous response patterns.                                                                      |
| Introduction                                                                                                                                                                                                    | 3b     | Objectives and intended use      | State study objectives and intended model use/users.                                                                                                   | Complete                              | Final Introduction paragraph                                         | Objectives are listed as MASLD discrimination, HFF response prediction, and subgroup interaction testing; intended users include hepatology, primary care, and dietitian workflows.                                                             |
| Methods                                                                                                                                                                                                         | 4a     | Source of data — design          | Describe study design, data source, and dates.                                                                                                         | Complete                              | Methods: Study design and participants                               | HAT is described as a multicenter randomized controlled trial; enrollment/follow-up dates are in Results Study population.                                                                                                                      |
| Methods                                                                                                                                                                                                         | 4b     | Source of data — setting         | Describe healthcare/research setting and source population.                                                                                            | Complete                              | Methods: Study design and participants                               | Multicenter US academic medical centers and abdominal-obesity trial population described.                                                                                                                                                       |
| Methods                                                                                                                                                                                                         | 5a     | Participants — eligibility       | Specify eligibility criteria, exclusions, participant flow, and analytic sample.                                                                       | Complete                              | Methods: Study design and participants; Figure 1                     | Eligibility, exclusions, source participants, and final analytic cohort n=790 are described and visualized in Figure 1.                                                                                                                         |
| Methods                                                                                                                                                                                                         | 5b     | Treatments/exposures             | Describe interventions/exposures received, especially if randomized.                                                                                   | Complete                              | Methods: Study design and participants                               | Randomized 1:1 avocado-supplemented diet vs habitual diet for 26 weeks is reported.                                                                                                                                                             |
| Methods                                                                                                                                                                                                         | 6a     | Outcome definition               | Define each outcome being predicted and timing of assessment.                                                                                          | Complete                              | Methods: Predictive modeling: feature sets and outcomes              | Baseline MASLD status, primary HFF_Responder endpoint, and secondary ≥5 percentage-point absolute HFF reduction endpoint are defined with n and positives.                                                                                      |
| Methods                                                                                                                                                                                                         | 6b     | Outcome ascertainment            | Describe outcome measurement method, timing, and blinding where relevant.                                                                              | Complete                              | Methods: Imaging and Subgroup Analyses                               | HFF and VAT MRI-PDFF measurements at baseline and week 26 are described; quality control by readers blinded to randomization arm is stated.                                                                                                     |
| Methods                                                                                                                                                                                                         | 7a     | Predictors                       | Define candidate predictors, timing, and source.                                                                                                       | Complete                              | Methods: Predictive modeling; Supplementary Table S4                 | Baseline demographics, anthropometrics, labs, lipidomic measures, fatty acids, and SDoH indicators are described; full codebook/missingness in Supplementary Table S4.                                                                          |
| Methods                                                                                                                                                                                                         | 7b     | Predictor measurement and timing | Describe predictor measurement relative to outcome and whether leakage was avoided.                                                                    | Complete with caveat                  | Methods: Predictive modeling; Model development; Internal validation | Predictors are baseline variables and imputation/selection are fitted on training folds. Final text could be strengthened by adding: 'All predictors were measured at baseline before week-26 outcome ascertainment.'                           |
| Methods                                                                                                                                                                                                         | 8      | Sample size                      | Explain sample size and number of events/non-events for prediction tasks.                                                                              | Complete                              | Methods: Predictive modeling                                         | Reports n=790, 261 HFF_Responder positives, 74 reduction-only positives, and EPV rationale.                                                                                                                                                     |
| Methods                                                                                                                                                                                                         | 9      | Missing data                     | Describe missing-data exclusions, imputation, and limitations.                                                                                         | Complete                              | Methods: Study design and participants; Model development            | Variables with >50% missingness excluded; retained variables median/mode imputed on training folds; lack of multiple imputation acknowledged.                                                                                                   |
| Methods                                                                                                                                                                                                         | 10a    | Continuous predictors            | Describe transformations/scaling/categorization of continuous predictors.                                                                              | Complete                              | Methods: Calibration; Supplementary Table S3                         | Training-fold preprocessing and hyperparameter specifications are reported; continuous clinical variables are handled within model pipelines and detailed in Supplementary Table S3.                                                            |

|              |     |                                       |                                                                                                  |                                          |                                                                                                     |                                                                                                                                                                                                         |
|--------------|-----|---------------------------------------|--------------------------------------------------------------------------------------------------|------------------------------------------|-----------------------------------------------------------------------------------------------------|---------------------------------------------------------------------------------------------------------------------------------------------------------------------------------------------------------|
| Methods      | 10b | Categorical predictors                | Describe handling/encoding of categorical predictors.                                            | <b>Complete</b>                          | Methods: Predictive modeling; Supplementary Table S3/S4                                             | Categorical SDoH and clinical variables are included; codebook and model preprocessing details are provided in Supplementary Tables S3–S4.                                                              |
| Methods      | 10c | Model development                     | Describe algorithms, feature selection, tuning, class imbalance handling, and final fitting.     | <b>Complete</b>                          | Methods: Model development and explainability; Internal validation; Calibration                     | Bootstrap RF feature selection, logistic regression, random forest, XGBoost, RandomizedSearchCV, cross-validation, sample weights, and no oversampling are described.                                   |
| Methods      | 10d | Model specification / hyperparameters | Report model specification, hyperparameters, regularization, and software.                       | <b>Complete</b>                          | Methods: Calibration; Supplementary Table S3; Code Availability                                     | Randomized search and software versions are in Methods; final hyperparameters and regularization details in Supplementary Table S3.                                                                     |
| Methods      | 10e | Performance measures                  | Define discrimination, calibration, threshold metrics, and clinical utility measures.            | <b>Complete</b>                          | Methods: Model development; Calibration; Discussion DCA                                             | AUROC, accuracy, precision, recall, F1-score, specificity, Youden threshold, ECE, Brier score, reliability diagrams, and decision-curve analysis are described.                                         |
| Methods      | 11  | Risk groups / thresholds              | Describe how predictions were converted to groups or decisions.                                  | <b>Complete</b>                          | Methods: Model development and explainability; Results ML section                                   | Predicted probabilities were dichotomized using Youden-optimal threshold; LR+/LR- and DCA threshold interpretation reported in Discussion/Supplementary Table S3                                        |
| Methods      | 12  | Development vs validation             | Describe validation design and any model updating if applicable.                                 | <b>Complete</b>                          | Methods: Internal validation strategy                                                               | Single stratified 70/30 train/test split, internal cross-validation for tuning, test-set bootstrap, and resample-then-split sensitivity are described. No external validation; limitation acknowledged. |
| AI extension | 13a | Training data transparency            | Report train/test split, seed, stratification, leakage prevention, and resampling.               | <b>Complete</b>                          | Methods: Internal validation strategy                                                               | 70/30 split, seed=42, class stratification, training-fold tuning, bootstrap test resampling, and internal-validation interpretation are stated.                                                         |
| AI extension | 13b | Software/environment                  | Report software, packages, versions, and computing environment.                                  | <b>Complete</b>                          | Methods: Calibration; Code Availability                                                             | Python 3.11, scikit-learn v1.3, xgboost v2.0, shap v0.42, environment file, and repository are described.                                                                                               |
| AI extension | 14  | Explainability/interpretability       | Describe interpretability approach and clarify whether used for interpretation or selection.     | <b>Complete</b>                          | Methods: Calibration/explainability; Figures 5–7                                                    | SHAP and permutation importance are used for feature attribution/interpretation; bootstrap RF was used for feature selection.                                                                           |
| AI extension | 15  | Fairness/subgroup performance         | Report or discuss performance and limitations across relevant subgroups.                         | <b>Complete with caveat</b>              | Results subgroup analyses; Clinical interpretability; Discussion limitations; Supplementary Figures | Sex/glycemic subgroup effects and subgroup SHAP summaries are presented; limitations note small diabetes and race/ethnicity subgroups. Formal fairness metrics are not performed.                       |
| AI extension | 16  | Reproducibility — code/data/model     | State access to code, data, model artifacts, and restrictions.                                   | <b>Complete with final release check</b> | Data Availability; Code Availability; Supplementary Table S3/S4                                     | Code repository and planned public release/review-token access are stated. Ensure repository is accessible to editors/reviewers before submission.                                                      |
| Results      | 17  | Participant flow                      | Report participant flow and exclusions.                                                          | <b>Complete</b>                          | Figure 1; Results Study population                                                                  | Figure 1 gives source cohort, exclusions, analytic cohort, and randomized arms.                                                                                                                         |
| Results      | 18  | Sample characteristics                | Report baseline participant characteristics and outcome distribution.                            | <b>Complete</b>                          | Results: Study population; Table 1; Supplementary Figures S1–S2                                     | Baseline characteristics by MASLD status are in Table 1; baseline HFF range/mean/median and distributions are reported.                                                                                 |
| Results      | 19a | Model performance — discrimination    | Report discrimination with uncertainty for each model/outcome.                                   | <b>Complete</b>                          | Results ML section; Figures 5–7; Supplementary Figures S4–S6; Supplementary Tables S1–S2            | MASLD AUROC, HFF_Responder AUROC, and reduction-only AUROC are reported with bootstrap summaries in main/supplement.                                                                                    |
| Results      | 19b | Model performance — calibration       | Report calibration with prespecified thresholds and calibration plots.                           | <b>Complete</b>                          | Results ML section; Supplementary Figure S9; Supplementary Table S3                                 | ECE and Brier score are reported; MASLD classifier ECE did not meet target; HFF_Responder ECE met target.                                                                                               |
| Results      | 19c | Clinical utility                      | Report clinical utility analyses when relevant.                                                  | <b>Complete</b>                          | Discussion implementation paragraph; Figure 8                                                       | Decision-curve analysis is reported in Figure 8 and discussed conservatively as internal/hypothesis-generating.                                                                                         |
| Results      | 20  | Model presentation                    | Present final model features/structure or provide access.                                        | <b>Complete</b>                          | Figures 5–7; Supplementary Table S3; Code Availability                                              | Final model predictors/importance are in Figures 5–7; hyperparameters and regularization in Supplementary Table S3; model artifacts described in repository.                                            |
| Discussion   | 21  | Limitations                           | Discuss limitations including bias, overfitting, calibration, sample size, and generalizability. | <b>Complete</b>                          | Discussion limitations paragraph                                                                    | Limitations include single cohort, internal validation only, baseline HFF/MASLD outcome alignment, FRS overlap, small subgroups, calibration failure, and need for external validation.                 |

|            |    |                                    |                                                                                                  |                                          |                                                   |                                                                                                                                                                                                                                 |
|------------|----|------------------------------------|--------------------------------------------------------------------------------------------------|------------------------------------------|---------------------------------------------------|---------------------------------------------------------------------------------------------------------------------------------------------------------------------------------------------------------------------------------|
| Discussion | 21 | Limitations                        | Discuss limitations including bias, overfitting, calibration, sample size, and generalizability. | <b>Complete</b>                          | Discussion limitations paragraph                  | Limitations include single cohort, internal validation only, baseline HFF/MASLD outcome alignment, FRS overlap, small subgroups, calibration failure, and need for external validation.                                         |
| Discussion | 22 | Interpretation                     | Interpret results in light of objectives, limitations, and prior evidence.                       | <b>Complete</b>                          | Discussion                                        | Discussion links neutral parent trial average effects, subgroup heterogeneity, and ML interpretability to precision-nutrition hypothesis.                                                                                       |
| Discussion | 23 | Implications / implementation      | Discuss intended use, clinical actionability, thresholds, and deployment caveats.                | <b>Complete</b>                          | Discussion implementation paragraph               | Two-stage diagnostic-to-therapeutic workflow, LR+/LR-, DCA, recalibration, and external validation requirements are described.                                                                                                  |
| Other      | 24 | Funding and funder role            | Report funding sources and funder role.                                                          | <b>Complete with caveat</b>              | Acknowledgements and Funding                      | Funding sources are reported. Add a funder-role sentence if not already present: 'The funders had no role in the present secondary analysis, model development, interpretation, manuscript preparation, or decision to submit.' |
| Other      | 25 | Registration                       | Provide study registration.                                                                      | <b>Complete</b>                          | Methods; Ethics                                   | Parent HAT trial registration NCT03528031 is reported.                                                                                                                                                                          |
| Other      | 26 | Protocol/statistical analysis plan | State where protocol and analysis plan are available.                                            | <b>Complete</b>                          | Methods; Supplementary Methods; Code Availability | Parent trial protocol cited [9,10]; secondary-analysis pipeline and code repository are described; TRIPOD+AI checklist provided as Supplementary Table S5.                                                                      |
| Other      | 27 | Data/code sharing                  | Describe data, code, trained models, restrictions, and access process.                           | <b>Complete with final release check</b> | Data Availability; Code Availability              | De-identified data access by request/data-use agreement; code and model artifacts to be public at publication with review-token access for peer review.                                                                         |
